# Supplementary material for: CANDLES, an assay for monitoring GPCR induced cAMP generation in cell cultures
Source: PubMed Central journal article supplement (PMC4228090; doi:10.1186/s12964-014-0070-x), 2014-11-04
Supplement: 12964_2014_70_MOESM1_ESM.pdf [file 12964_2014_70_MOESM1_ESM.pdf]

# GS-293 and FSHR-293 co-culture IBMX concentration

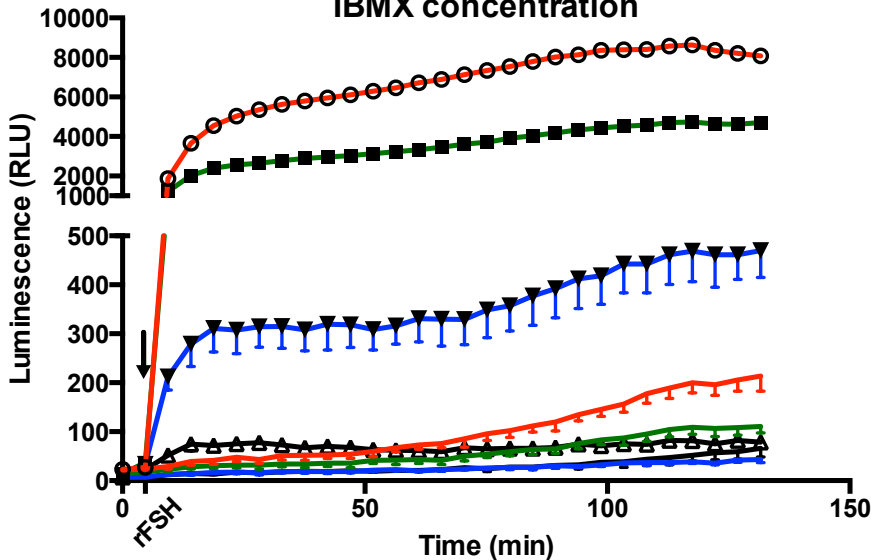

- IBMX (200 μM) rFSH
- IBMX (100 μM) rFSH
- ▼ IBMX (10 μM) rFSH
- ▲ IBMX (1 μM) rFSH
- IBMX (200 μM) Unstimulated
- IBMX (100 μM) Unstimulated
- IBMX (10 μM) Unstimulated
- IBMX (1 μM) Unstimulated
