# Supplementary material for: CANDLES, an assay for monitoring GPCR induced cAMP generation in cell cultures
Source: PubMed Central journal article supplement (PMC4228090; doi:10.1186/s12964-014-0070-x), 2014-11-04
Supplement: 12964_2014_70_MOESM2_ESM.pdf [file 12964_2014_70_MOESM2_ESM.pdf]

# EPAC-293 and FSHR-293 co-culture

## FSH Dose response

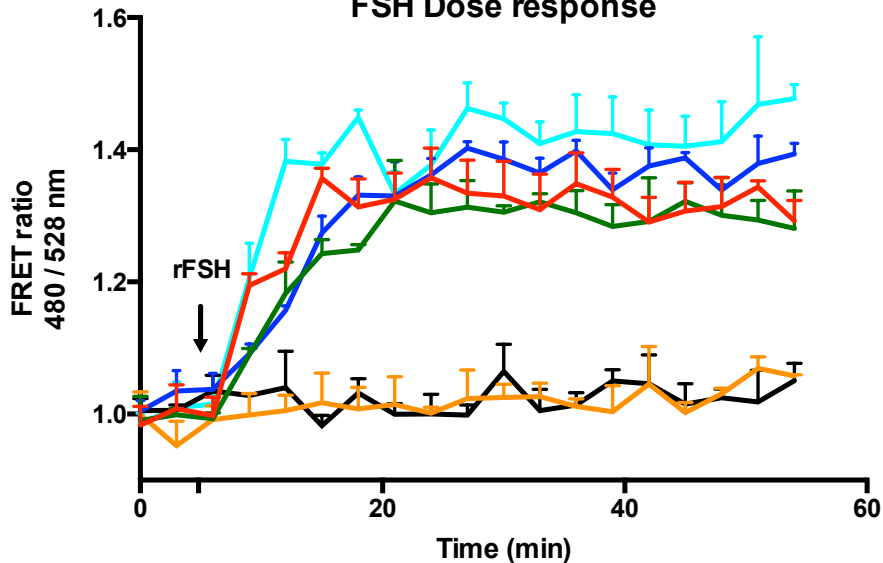

— rFSH (1000 mlU/ml)

— rFSH (10 mlU/ml)

— rFSH (200 mlU/ml)

— Control Unstimulated

— rFSH (100 mlU/ml)

— Forskolin (10  $\mu$ M)
