# Supplementary material for: CANDLES, an assay for monitoring GPCR induced cAMP generation in cell cultures
Source: PubMed Central journal article supplement (PMC4228090; doi:10.1186/s12964-014-0070-x), 2014-11-04
Supplement: 12964_2014_70_MOESM4_ESM.pdf [file 12964_2014_70_MOESM4_ESM.pdf]

# GS-293 and FSHR-293 co-culture 37 °C vs Room temperature (25 °C)

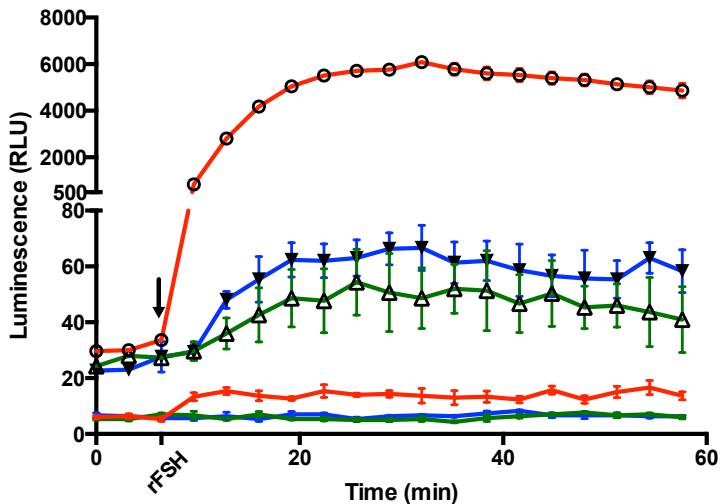

- 25 °C GS-293 and FSHR-293 rFSH
- △ 25 °C GS-293 and FSHR-293 Unstimulated
- ▼ 25 °C GS-293 Unstimulated
- 37 °C GS-293 and FSHR-293 rFSH
- 37 °C GS-293 and FSHR-293 Unstimulated
- 37 °C GS-293 Unstimulated
